# Supplementary material
Source: publisher site journal article supplement (https://www.dovepress.com/article/373444)
Supplement: Supplementary file 1 [file get_supplementary_file.php]

**Childhood environmental unpredictability and prosocial behavior in adults: The effect of life-history strategy and dark personalities**

***Supplementary Material***

**Table S1** The results of the independent sample t-test of sex differences

| Variable | Women  *n* = 595 | Men  *n* = 440 | *t* | Cohen’s *d* | 95% CI | |
| --- | --- | --- | --- | --- | --- | --- |
| Lower | Upper |
| PSB | 5.210(0.712) | 4.961(0.749) | 5.421*** | 0.340 | 0.158 | 0.338 |
| Life-History Strategy | 4.735(0.648) | 4.553(0.667) | 4.392*** | 0.276 | 0.100 | 0.262 |
| Machiavellianism | 4.579(1.167) | 4.790(1.133) | -2.920** | 0.148 | -0.354 | -0.069 |
| Narcissism | 3.822(1.038) | 4.158(1.096) | -5.014*** | 0.341 | -0.466 | -0.204 |
| Psychopathy | 2.581(0.778) | 3.828(0.853) | -24.472*** | 1.528 | -1.347 | -1.144 |
| Sadism | 3.280(1.113) | 3.772(1.191) | -6.818*** | 0.427 | -0.633 | -0.350 |

**Note**:***p* < .01, ****p* < .001

**Abbreviations:** PSB, prosocial behavior

**Table S2** The results of sex multigroup analysis of Model 1

| Model | χ2 | *df* | RMSEA | CFI | TLI | SRMR | Δχ2 | Δ*df* | ΔCFI | ΔTLI |
| --- | --- | --- | --- | --- | --- | --- | --- | --- | --- | --- |
| Configural Invariance | 264.100 | 124 | 0.047 | 0.976 | 0.969 | 0.044 |  |  |  |  |
| Metric Invariance/  Weak Invariance | 275.006 | 134 | 0.045 | 0.976 | 0.972 | 0.049 | 10.906 | 10 | 0 | 0.003 |
| Scalar Invariance/  Strong Invariance | 284.309 | 144 | 0.043 | 0.976 | 0.974 | 0.050 | 9.303 | 10 | 0 | 0.002 |
| Error Variance Invariance/  Strict Invariance | 335.409 | 157 | 0.047 | 0.969 | 0.969 | 0.073 | 51.100 | 13 | -0.007 | -0.005 |

**Table S3** The results of sex multigroup analysis of Model 2

| Model | χ2 | *df* | RMSEA | CFI | TLI | SRMR | Δχ2 | Δ*df* | ΔCFI | ΔTLI |
| --- | --- | --- | --- | --- | --- | --- | --- | --- | --- | --- |
| Configural Invariance | 1649.481 | 698 | 0.051 | 0.939 | 0.929 | 0.050 |  |  |  |  |
| Metric Invariance/  Weak Invariance | 1672.572 | 719 | 0.051 | 0.939 | 0.931 | 0.051 | 23.091 | 21 | 0 | 0.002 |
| Scalar Invariance/  Strong Invariance | 1742.956 | 740 | 0.051 | 0.936 | 0.930 | 0.052 | 70.384 | 21 | -0.003 | -0.001 |
| Error Variance Invariance/  Strict Invariance | 1815.578 | 769 | 0.051 | 0.933 | 0.930 | 0.058 | 72.622 | 29 | -0.003 | 0 |

**Table S4** The results of sex multigroup analysis of Model 3

| Model | χ2 | *df* | RMSEA | CFI | TLI | SRMR | Δχ2 | Δ*df* | ΔCFI | ΔTLI |
| --- | --- | --- | --- | --- | --- | --- | --- | --- | --- | --- |
| Configural Invariance | 1539.790 | 934 | 0.035 | 0.971 | 0.968 | 0.031 |  |  |  |  |
| Metric Invariance/  Weak Invariance | 1562.122 | 959 | 0.035 | 0.971 | 0.969 | 0.033 | 22.332 | 25 | 0 | 0.001 |
| Scalar Invariance/  Strong Invariance | 1595.529 | 984 | 0.035 | 0.971 | 0.969 | 0.034 | 33.407 | 25 | 0 | 0 |
| Error Variance Invariance/  Strict Invariance | 1710.883 | 1017 | 0.036 | 0.967 | 0.966 | 0.040 | 115.354 | 33 | -0.004 | -0.003 |

**Table S5** The results of sex multigroup analysis of Model 4

| Model | χ2 | *df* | RMSEA | CFI | TLI | SRMR | Δχ2 | Δ*df* | ΔCFI | ΔTLI |
| --- | --- | --- | --- | --- | --- | --- | --- | --- | --- | --- |
| Configural Invariance | 3740.387 | 2098 | 0.039 | 0.948 | 0.941 | 0.038 |  |  |  |  |
| Metric Invariance/  Weak Invariance | 3778.034 | 2134 | 0.039 | 0.948 | 0.942 | 0.040 | 37.647 | 36 | 0 | 0.001 |
| Scalar Invariance/  Strong Invariance | 3871.906 | 2170 | 0.039 | 0.946 | 0.941 | 0.040 | 93.872 | 36 | -0.002 | -0.001 |
| Error Variance Invariance/  Strict Invariance | 4009.059 | 2219 | 0.039 | 0.943 | 0.940 | 0.042 | 137.153 | 49 | -0.003 | -0.001 |
